# Supplementary material for: Comparison of Artificial Intelligence-Based Applications for Mandible Segmentation: From Established Platforms to In-House-Developed Software
Source: MDPI journal article supplement (doi:10.3390/bioengineering10050604), 2023-05-17
Supplement: s1 [file s1]

## Annexes

### Annex S1 Test data DICOM properties

|              | Voxel spacing (X, Y) | Slice thickness | Nr. Slices   | Orientation |
|--------------|----------------------|-----------------|--------------|-------------|
| CT w/ A 1    | 0.357                | 1.0             | 337          | Axial       |
| CT w/ A 2    | 0.586                | 0.75            | 440          | Axial       |
| CT w/ A 3    | 0.344                | 0.75            | 317          | Axial       |
| CT w/ A 4    | 0.475                | 3.0             | 213          | Axial       |
| CT w/ A 5    | 0.334                | 0.75            | 325          | Axial       |
| CT w/o A 1   | 0.479                | 1.0             | 341          | Axial       |
| CT w/o A 2   | 0.490                | 0.75            | 331          | Axial       |
| CT w/o A 3   | 0.449                | 1.0             | 293          | Axial       |
| CT w/o A 4   | 0.502                | 1.0             | 483          | Axial       |
| CT w/o A 5   | 0.441                | 1.0             | 489          | Axial       |
| CBCT w/ A 1  | 0.25                 | 0.25            | 421          | Axial       |
| CBCT w/ A 2  | 0.25                 | 0.25            | 424          | Axial       |
| CBCT w/ A 3  | 0.25                 | 0.25            | 424          | Axial       |
| CBCT w/ A 4  | 0.25                 | 0.25            | 424          | Axial       |
| CBCT w/ A 5  | 0.327                | 1.0             | 169          | Sagittal    |
| CBCT w/o A 1 | 0.25                 | 0.25            | 424          | Axial       |
| CBCT w/o A 2 | 0.25                 | 0.25            | 421          | Axial       |
| CBCT w/o A 3 | 0.25                 | 0.25            | 424          | Axial       |
| CBCT w/o A 4 | 0.25                 | 0.25            | 421          | Axial       |
| CBCT w/o A 5 | 0.3                  | 0.3             | 443          | Axial       |
| <i>Mean</i>  | <i>0.3542</i>        | <i>0.715</i>    | <i>378.2</i> | -           |

### Annex S2 Dice similarity coefficient (DSC) of the mandible with teeth comparison

|                       | Manual (beginner) | In-house     | Relu         | Materialise  | Diagnocat    | Brainlab     |
|-----------------------|-------------------|--------------|--------------|--------------|--------------|--------------|
| CT w/ A 1             | 0.948             | 0.882        | 0.939        | 0.919        | 0.930        | 0.924        |
| CT w/ A 2             | 0.967             | 0.906        | 0.949        | 0.932        | 0.943        | 0.910        |
| CT w/ A 3             | 0.979             | 0.898        | 0.954        | 0.941        | 0.947        | 0.917        |
| CT w/ A 4             | 0.932             | 0.862        | 0.919        | 0.863        | 0.888        | 0.883        |
| CT w/ A 5             | 0.980             | 0.877        | 0.932        | 0.918        | 0.927        | 0.915        |
| <i>Mean CT w/ A</i>   | <b>0.961</b>      | <b>0.885</b> | <b>0.939</b> | <b>0.914</b> | <b>0.927</b> | <b>0.910</b> |
| CT w/o A 1            | 0.944             | 0.889        | 0.939        | 0.909        | 0.926        | 0.900        |
| CT w/o A 2            | 0.964             | 0.886        | 0.934        | 0.895        | 0.914        | 0.897        |
| CT w/o A 3            | 0.984             | 0.912        | 0.954        | 0.915        | 0.938        | 0.922        |
| CT w/o A 4            | 0.974             | 0.890        | 0.914        | 0.898        | 0.916        | 0.909        |
| CT w/o A 5            | 0.973             | 0.878        | 0.932        | 0.896        | 0.913        | 0.886        |
| <i>Mean CT w/o A</i>  | <b>0.968</b>      | <b>0.891</b> | <b>0.935</b> | <b>0.903</b> | <b>0.921</b> | <b>0.903</b> |
| CBCT w/ A 1           | 0.953             | 0.896        | 0.936        | 0.955        | 0.944        | 0.911        |
| CBCT w/ A 2           | 0.944             | 0.885        | 0.932        | 0.930        | 0.942        | 0.828        |
| CBCT w/ A 3           | 0.952             | 0.739        | 0.943        | 0.954        | 0.928        | 0.768        |
| CBCT w/ A 4           | 0.958             | 0.893        | 0.944        | 0.959        | 0.948        | 0.878        |
| CBCT w/ A 5           | 0.950             | 0.900        | 0.932        | 0.939        | 0.944        | 0.722        |
| <i>Mean CBCT w/ A</i> | <b>0.951</b>      | <b>0.863</b> | <b>0.938</b> | <b>0.947</b> | <b>0.941</b> | <b>0.821</b> |
| CBCT w/o A 1          | 0.973             | 0.905        | 0.943        | 0.961        | 0.950        | 0.779        |
| CBCT w/o A 2          | 0.956             | 0.889        | 0.935        | 0.953        | 0.949        | 0.889        |

|                        |              |              |              |              |              |              |
|------------------------|--------------|--------------|--------------|--------------|--------------|--------------|
| CBCT w/o A 3           | 0.954        | 0.897        | 0.940        | 0.955        | 0.949        | 0.861        |
| CBCT w/o A 4           | 0.959        | 0.905        | 0.940        | 0.967        | 0.950        | 0.891        |
| CBCT w/o A 5           | 0.947        | 0.901        | 0.938        | 0.942        | 0.938        | 0.912        |
| <i>Mean CBCT w/o A</i> | <b>0.958</b> | <b>0.899</b> | <b>0.939</b> | <b>0.956</b> | <b>0.947</b> | <b>0.866</b> |
| <i>Mean</i>            | <b>0.960</b> | <b>0.884</b> | <b>0.938</b> | <b>0.930</b> | <b>0.934</b> | <b>0.875</b> |

**Annex S3** Dice similarity coefficient (DSC) of the mandibular bone comparison

|                        | Manual (beginner) | In-house     | Relu         | Materialise  | Diagnocat    | Brainlab     |
|------------------------|-------------------|--------------|--------------|--------------|--------------|--------------|
| CT w/ A 1              | 0.949             | 0.891        | 0.951        | 0.923        | 0.937        | 0.960        |
| CT w/ A 2              | 0.971             | 0.928        | 0.966        | 0.945        | 0.955        | 0.945        |
| CT w/ A 3              | 0.980             | 0.904        | 0.969        | 0.946        | 0.958        | 0.963        |
| CT w/ A 4              | 0.960             | 0.883        | 0.958        | 0.891        | 0.925        | 0.918        |
| CT w/ A 5              | 0.981             | 0.884        | 0.947        | 0.923        | 0.940        | 0.955        |
| <i>Mean CT w/ A</i>    | <b>0.968</b>      | <b>0.898</b> | <b>0.958</b> | <b>0.925</b> | <b>0.943</b> | <b>0.948</b> |
| CT w/o A 1             | 0.945             | 0.898        | 0.956        | 0.916        | 0.939        | 0.941        |
| CT w/o A 2             | 0.965             | 0.894        | 0.952        | 0.901        | 0.930        | 0.937        |
| CT w/o A 3             | 0.986             | 0.919        | 0.968        | 0.921        | 0.948        | 0.957        |
| CT w/o A 4             | 0.977             | 0.900        | 0.932        | 0.904        | 0.933        | 0.951        |
| CT w/o A 5             | 0.972             | 0.887        | 0.950        | 0.902        | 0.929        | 0.931        |
| <i>Mean CT w/o A</i>   | <b>0.969</b>      | <b>0.900</b> | <b>0.952</b> | <b>0.909</b> | <b>0.936</b> | <b>0.943</b> |
| CBCT w/ A 1            | 0.969             | 0.910        | 0.945        | 0.970        | 0.953        | 0.936        |
| CBCT w/ A 2            | 0.960             | 0.900        | 0.945        | 0.948        | 0.951        | 0.868        |
| CBCT w/ A 3            | 0.955             | 0.738        | 0.945        | 0.958        | 0.933        | 0.774        |
| CBCT w/ A 4            | 0.969             | 0.910        | 0.950        | 0.968        | 0.956        | 0.926        |
| CBCT w/ A 5            | 0.9623            | 0.907        | 0.938        | 0.951        | 0.949        | 0.757        |
| <i>Mean CBCT w/ A</i>  | <b>0.963</b>      | <b>0.873</b> | <b>0.944</b> | <b>0.959</b> | <b>0.948</b> | <b>0.852</b> |
| CBCT w/o A 1           | 0.976             | 0.916        | 0.944        | 0.961        | 0.951        | 0.825        |
| CBCT w/o A 2           | 0.961             | 0.898        | 0.938        | 0.959        | 0.950        | 0.917        |
| CBCT w/o A 3           | 0.961             | 0.899        | 0.942        | 0.954        | 0.950        | 0.911        |
| CBCT w/o A 4           | 0.960             | 0.909        | 0.943        | 0.969        | 0.954        | 0.930        |
| CBCT w/o A 5           | 0.952             | 0.904        | 0.950        | 0.948        | 0.946        | 0.933        |
| <i>Mean CBCT w/o A</i> | <b>0.962</b>      | <b>0.905</b> | <b>0.943</b> | <b>0.958</b> | <b>0.950</b> | <b>0.903</b> |
| <i>Mean</i>            | <b>0.966</b>      | <b>0.894</b> | <b>0.949</b> | <b>0.938</b> | <b>0.944</b> | <b>0.912</b> |

**Annex S4** Dice similarity coefficient (DSC) of the mandibular teeth comparison

|                      | Manual (beginner) | In-house     | Relu         | Materialise  | Diagnocat    | Brainlab     |
|----------------------|-------------------|--------------|--------------|--------------|--------------|--------------|
| CT w/ A 1A           | 0.931             | 0.810        | 0.848        | 0.871        | 0.860        | 0.584        |
| CT w/ A 2            | 0.944             | 0.710        | 0.825        | 0.833        | 0.849        | 0.566        |
| CT w/ A 3            | 0.974             | 0.838        | 0.851        | 0.889        | 0.852        | 0.423        |
| CT w/ A 4            | 0.795             | 0.750        | 0.720        | 0.717        | 0.692        | 0.685        |
| CT w/ A 5            | 0.972             | 0.827        | 0.827        | 0.879        | 0.830        | 0.552        |
| <i>Mean CT w/ A</i>  | <b>0.923</b>      | <b>0.787</b> | <b>0.814</b> | <b>0.838</b> | <b>0.817</b> | <b>0.562</b> |
| CT w/o A 1           | 0.933             | 0.818        | 0.783        | 0.841        | 0.796        | 0.411        |
| CT w/o A 2           | 0.948             | 0.823        | 0.790        | 0.841        | 0.790        | 0.536        |
| CT w/o A 3           | 0.959             | 0.826        | 0.809        | 0.850        | 0.817        | 0.441        |
| CT w/o A 4           | 0.968             | 0.827        | 0.802        | 0.865        | 0.807        | 0.569        |
| CT w/o A 5           | 0.955             | 0.795        | 0.775        | 0.836        | 0.773        | 0.382        |
| <i>Mean CT w/o A</i> | <b>0.953</b>      | <b>0.818</b> | <b>0.792</b> | <b>0.847</b> | <b>0.797</b> | <b>0.468</b> |
| CBCT w/ A 1          | 0.789             | 0.725        | 0.826        | 0.800        | 0.841        | 0.509        |
| CBCT w/ A 2          | 0.756             | 0.712        | 0.761        | 0.749        | 0.810        | 0.495        |
| CBCT w/ A 3          | 0.850             | 0.729        | 0.885        | 0.853        | 0.789        | 0.583        |
| CBCT w/ A 4          | 0.912             | 0.797        | 0.911        | 0.911        | 0.913        | 0.645        |
| CBCT w/ A 5          | 0.885             | 0.847        | 0.907        | 0.875        | 0.912        | 0.352        |

|                        |              |              |              |              |              |              |
|------------------------|--------------|--------------|--------------|--------------|--------------|--------------|
| <i>Mean CBCT w/ A</i>  | <b>0.838</b> | <b>0.762</b> | <b>0.858</b> | <b>0.837</b> | <b>0.853</b> | <b>0.517</b> |
| CBCT w/o A 1           | 0.953        | 0.815        | 0.933        | 0.959        | 0.942        | 0.199        |
| CBCT w/o A 2           | 0.936        | 0.804        | 0.913        | 0.927        | 0.932        | 0.561        |
| CBCT w/o A 3           | 0.947        | 0.870        | 0.924        | 0.950        | 0.940        | 0.041        |
| CBCT w/o A 4           | 0.957        | 0.869        | 0.921        | 0.961        | 0.927        | 0.547        |
| CBCT w/o A 5           | 0.882        | 0.848        | 0.756        | 0.876        | 0.775        | 0.575        |
| <i>Mean CBCT w/o A</i> | <b>0.935</b> | <b>0.841</b> | <b>0.889</b> | <b>0.935</b> | <b>0.903</b> | <b>0.384</b> |
| <i>Mean</i>            | <b>0.912</b> | <b>0.802</b> | <b>0.838</b> | <b>0.864</b> | <b>0.842</b> | <b>0.483</b> |

**Annex S5** Mean values for the comparison of the mandible with teeth segmentations, mandibular bone and mandibular teeth to the ground truth by using the dice similarity coefficient (DSC), average surface distance (ASD), Hausdorff distance (HD), relative volume difference (RVD), volumetric overlap error (VOE), false positive rate (FPR) and false negative rate (FNR)

|                      | Mean DSC±SD  | Mean ASD±SD | Mean HD±SD    | Mean RVD±SD     | Mean VOE±SD   | Mean FPR±SD         | Mean FNR±SD   |
|----------------------|--------------|-------------|---------------|-----------------|---------------|---------------------|---------------|
| Manual<br>(beginner) | 0.960±0.0138 | 0.518±0.232 | 12.682±6.768  | -0.00174±0.0418 | 0.077±0.025   | 0.000509±0.000423   | 0.0412±0.0261 |
|                      | 0.966±0.011  | 0.430±0.195 | 9.316±4.792   | -0.00664±0.0389 | 0.066±0.0202  | 0.000362±0.000295   | 0.0375±0.0256 |
|                      | 0.912±0.64   | 0.672±0.586 | 16.389±24.734 | 0.0529±0.123    | 0.155±0.102   | 0.0001439±0.000165  | 0.066±0.046   |
| In-house             | 0.884±0.035  | 1.609±0.641 | 37.393±67.022 | -0.144±0.074    | 0.206±0.051   | 0.000489±0.000496   | 0.178±0.058   |
|                      | 0.894±0.038  | 1.476±0.668 | 37.121±67.109 | -0.137±0.072    | 0.190±0.055   | 0.000376±0.000374   | 0.1660±0.0607 |
|                      | 0.802±0.049  | 1.554±0.541 | 16.056±7.056  | -0.185±0.124    | 0.328±0.0667  | 0.000124±0.000132   | 0.272±0.065   |
| Relu                 | 0.938±0.0096 | 0.804±0.214 | 13.921±6.641  | -0.00314±0.089  | 0.117±0.0170  | 0.000846±0.000863   | 0.0638±0.0438 |
|                      | 0.949±0.010  | 0.654±0.257 | 10.081±4.932  | 0.017±0.080     | 0.096±0.018   | 0.000757±0.000776   | 0.0427±0.0346 |
|                      | 0.838±0.063  | 1.131±0.401 | 12.584±6.974  | -0.147±0.175    | 0.273±0.094   | 0.0000915±0.000113  | 0.221±0.112   |
| Materialise          | 0.930±0.027  | 0.904±0.381 | 17.248±16.134 | -0.061±0.103    | 0.130±0.047   | 0.000524±0.000595   | 0.0973±0.0714 |
|                      | 0.938±0.025  | 0.773±0.322 | 13.814±16.167 | -0.057±0.096    | 0.116±0.043   | 0.000407±0.000458   | 0.0876±0.0674 |
|                      | 0.864±0.061  | 1.115±0.770 | 13.864±10.197 | -0.073±0.212    | 0.234±0.094   | 0.000118±0.000178   | 0.168±0.101   |
| Diagnocat            | 0.934±0.016  | 0.825±0.152 | 13.526±6.256  | -0.037±0.090    | 0.123 ±0.0277 | 0.000652±0.000672   | 0.082±0.054   |
|                      | 0.944±0.0099 | 0.692±0.158 | 11.494±5.975  | -0.0186±0.0832  | 0.105±0.018   | 0.000583±0.000591   | 0.064±0.046   |
|                      | 0.842±0.066  | 1.143±0.381 | 12.383±7.346  | -0.174±0.149    | 0.267±0.099   | 0.0000736±0.0000901 | 0.228±0.113   |
| Brainlab             | 0.875±0.055  | 2.194±1.465 | 34.265±21.534 | -0.0095±0.1394  | 0.218±0.082   | 0.001577±0.001574   | 0.132±0.047   |
|                      | 0.912±0.058  | 1.454±1.309 | 27.811±23.439 | 0.0540±0.1285   | 0.157±0.091   | 0.001385±0.001419   | 0.067±0.036   |
|                      | 0.483±0.149  | 7.339±8.956 | 34.850±21.756 | -0.4482±0.445   | 0.670±0.117   | 0.0002022±0.0003738 | 0.609±0.180   |
